# Supplementary material for: Stilbenes-enriched peanut sprouts alleviated physical fatigue via regulating interactions of nutrients–microbiota–metabolites revealed by multi-omics analysis
Source: Royal Society of Chemistry journal article supplement (doi:10.1039/d3fo04076c), 2024-01-01
Supplement: d3fo04076c1.pdf [file d3fo04076c1.pdf]

**Stilbenes-enriched peanut sprouts alleviated physical fatigue via regulating interactions of nutrients-microbiota-metabolites revealed by multi-omics analysis**

Tong Zhu<sup>a,b</sup>, Qi Pan<sup>b</sup>, Kunpeng Xiao<sup>b</sup>, Changzhou Zuo<sup>b</sup>, Qiang Liu<sup>c</sup>, Dandan Zhou<sup>d</sup>, Kang Tu<sup>b,\*</sup>

<sup>a</sup> *College of Food Science and Technology/Yunnan Key Laboratory of Precision Nutrition and Personalized Food Manufacturing, Yunnan Agricultural University, Kunming 650201, P. R. China*

<sup>b</sup> *College of Food Science and Technology, Nanjing Agricultural University, Nanjing 210095, P. R. China*

<sup>c</sup> *College of Food Science and Engineering/Collaborative Innovation Center for Modern Grain Circulation and Safety, Key Laboratory of Grains and Oils Quality Control and Processing, Nanjing University of Finance and Economics, Nanjing 210023, P. R. China*

<sup>d</sup> *College of Light Industry and Food Engineering, Nanjing Forestry University, Nanjing 210037, P. R. China*

**\*Corresponding author:**

Email: kangtu@njau.edu.cn

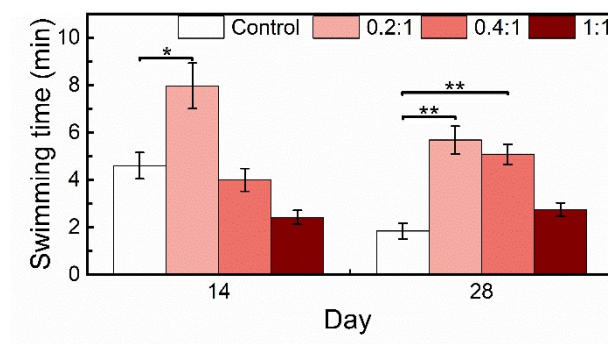

**Fig. S1.** Effect of diets with different adding ratios (0.2 : 1, 0.4 : 1, 1 : 1 w/w) of peanut sprouts (germinated under UV-C radiation) on the endurance time of weight-loaded swimming. Each group included six mice which were attached with a tin wire (10 % of body weight) for the test. Results were expressed as mean  $\pm$  SE in the bar graphs. Statistical analysis was performed by Tukey's post hoc test (\*:  $P < 0.05$ , \*\*:  $P < 0.01$ ).

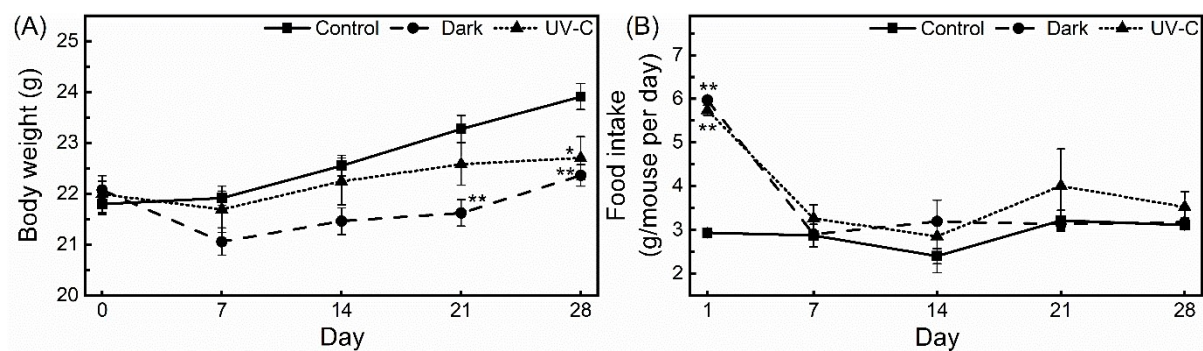

**Fig. S2.** Effect of peanut sprouts supplementation on body weight (A) and food intake (B) of mice. Data were expressed as mean  $\pm$  SE. Statistical analysis was performed by Tukey's post hoc test (\*:  $P < 0.05$ , \*\*:  $P < 0.01$  compared with the control).

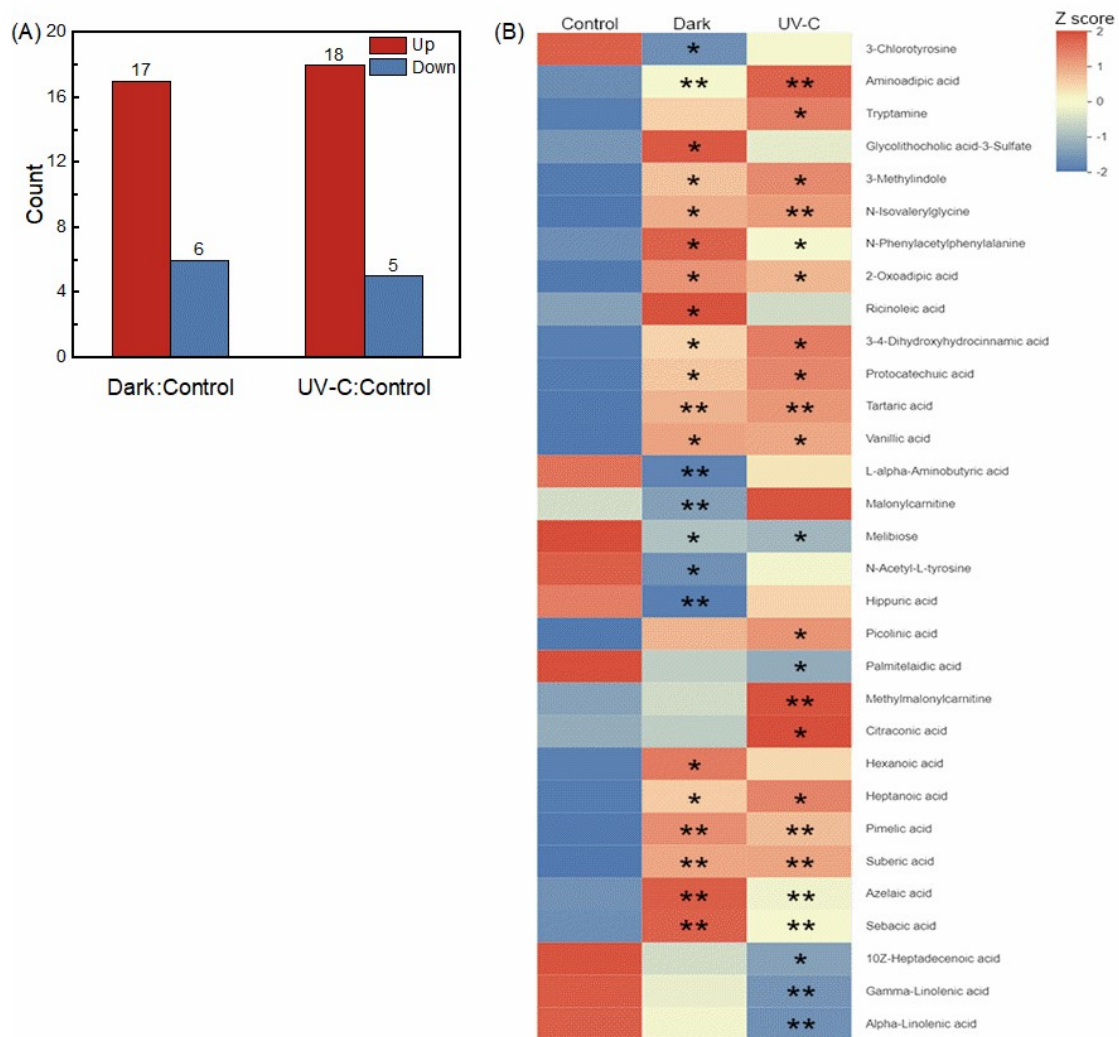

**Fig. S3.** Numbers of significantly altered gut metabolites by peanut sprouts supplementation

(A). Heatmap of significantly altered gut metabolites by peanut sprouts supplementation (B).

The changes of gut metabolites were represented by normalized Z-score for visualization.

Statistical significance was analyzed by Kruskal-Wallis test with Benjamini-Hochberg

correction (\*:  $P < 0.05$ , \*\*:  $P < 0.01$  compared with the control).

**Table S1.** The nutritional composition of normal diet

| Ingredient    | Content (%) | Ingredient | Content (%)           |
|---------------|-------------|------------|-----------------------|
| Crude protein | 19.32       | Leucine    | 1.78                  |
| Crude fat     | 4.90        | Isoleucine | 0.93                  |
| Crude fiber   | 2.10        | Valine     | 1.06                  |
| Crude ash     | 5.60        | Calcium    | 1.36                  |
| Moisture      | 8.50        | Magnesium  | 0.23                  |
| Lysine        | 1.34        | Phosphorus | 0.83                  |
| Cystine       | 0.25        | Sodium     | 0.30                  |
| Methionine    | 0.51        | Potassium  | 0.56                  |
| Arginine      | 1.15        | Iron       | 0.02                  |
| Histidine     | 0.46        | Manganese  | 0.02                  |
| Tryptophan    | 0.20        | Zinc       | 0.01                  |
| Phenylalanine | 0.88        | Copper     | $1.6 \times 10^{-3}$  |
| Tyrosine      | 0.64        | Iodine     | $1.83 \times 10^{-4}$ |
| Threonine     | 0.89        | Selenium   | $4 \times 10^{-5}$    |

Nutrient contents were expressed as the percentage of w/w, which were achieved the national standard of P. R. China for laboratory mouse feed (GB 14924.3-2010).

**Table S2.** Major macronutrients and bioactive compounds in peanut sprouts powder

| Composition               | Content                |                          |
|---------------------------|------------------------|--------------------------|
|                           | Dark                   | UV-C                     |
| Ash                       | 2.23 ± 0.06 g/100g     | 2.32 ± 0.02 g/100g       |
| Fat                       | 31.20 ± 0.66 g/100g    | 35.80 ± 0.40 g/100g**    |
| Dietary fiber             | 15.10 ± 2.46 g/100g    | 12.93 ± 1.90 g/100g      |
| Protein                   | 23.30 ± 0.20 g/100g    | 23.67 ± 0.15 g/100g      |
| Carbohydrate              | 22.37 ± 2.46 g/100g    | 20.17 ± 1.66 g/100g      |
| Total phenolics           | 4.28 ± 0.71 mg GAE/g   | 4.51 ± 0.84 mg GAE/g     |
| Total flavonoids          | 2.91 ± 0.60 mg rutin/g | 4.75 ± 0.71 mg rutin/g** |
| <i>trans</i> -Resveratrol | 2.04 ± 0.15 µg/g       | 52.31 ± 3.21 µg/g**      |
| <i>trans</i> -Piceid      | 1.98 ± 0.44 µg/g       | 2.06 ± 0.52 µg/g         |
| <i>trans</i> -Piceatannol | 1.87 ± 0.24 µg/g       | 2.94 ± 0.71 µg/g         |

Dark: peanut sprouts cultivated in dark; UV-C: peanut sprouts cultivated under UV-C radiation.

The data were expressed as mean ± SD with the value from three independent experiments (n=50 for each replicate).

\*\* represents significant difference at  $P < 0.01$  by an unpaired, two-tailed t-test.

**Table S3.** Changes of relative organ weight of mice by peanut sprouts supplementation

| Relative weight (%) | Control     | Dark          | UV-C        |
|---------------------|-------------|---------------|-------------|
| Heart               | 0.68 ± 0.06 | 0.78 ± 0.03   | 0.70 ± 0.03 |
| Lung                | 0.61 ± 0.02 | 0.63 ± 0.01   | 0.68 ± 0.05 |
| Liver               | 4.35 ± 0.08 | 4.99 ± 0.13** | 4.66 ± 0.09 |
| Spleen              | 0.34 ± 0.02 | 0.31 ± 0.03   | 0.31 ± 0.03 |
| Kidney              | 1.69 ± 0.02 | 1.79 ± 0.02   | 1.76 ± 0.04 |

ND: the normal diet group; Dark: the normal diet with peanut sprouts (cultivated in dark) supplementation group; UV-C: the normal diet with peanut sprouts (cultivated under UV-C radiation) supplementation group.

The data are expressed as mean ± SE (n=10).

\*\* represents significant level at  $P < 0.01$  compared with the ND group by ANOVA and Tukey's multiple comparisons test.

**Table S4.** Changes of gut metabolome in each groups analyzed by targeted UHPLC-MS/MS

| NO.         | Component                      | HMDB ID <sup>a</sup> | Content (μmol/g stool) |                   |                   |
|-------------|--------------------------------|----------------------|------------------------|-------------------|-------------------|
|             |                                |                      | Control                | Dark              | UV-C              |
| Amino acids |                                |                      |                        |                   |                   |
| 1           | 1-Methylhistidine              | HMDB0000001          | 0.0431 ± 0.0124        | 0.0368 ± 0.0094   | 0.0327 ± 0.0064   |
| 2           | 2-3-Diaminopropionic acid      | HMDB0002006          | 0.0365 ± 0.0147        | 0.0538 ± 0.0158   | 0.0693 ± 0.0187   |
| 3           | 2-Hydroxy-2-methylbutyric acid | HMDB0001987          | 0.0634 ± 0.0267        | 0.0949 ± 0.0459   | 0.0694 ± 0.0202   |
| 4           | 3-Chlorotyrosine               | HMDB0001885          | 0.6850 ± 0.1270        | 0.3430 ± 0.0882   | 0.4950 ± 0.1010   |
| 5           | 4-Hydroxyproline               | HMDB0000725          | 0.0182 ± 0.0036        | 0.0249 ± 0.0048   | 0.0122 ± 0.0028   |
| 6           | 5-Aminolevulinic acid          | HMDB0001149          | 1.1000 ± 0.2980        | 0.9890 ± 0.3440   | 0.8720 ± 0.1680   |
| 7           | Acetylglycine                  | HMDB0000532          | 0.9510 ± 0.2310        | 0.6770 ± 0.1780   | 0.6140 ± 0.1220   |
| 8           | Amino adipic acid              | HMDB0000510          | 1.4300 ± 0.2730        | 5.1500 ± 1.0700   | 9.2900 ± 1.5600   |
| 9           | Beta-Alanine                   | HMDB0000056          | 0.2010 ± 0.0198        | 0.1630 ± 0.0199   | 0.1960 ± 0.0532   |
| 10          | Betaine                        | HMDB0000043          | 0.7910 ± 0.2620        | 0.5370 ± 0.1970   | 0.7050 ± 0.1860   |
| 11          | Bicine                         | HMDB0011727          | 0.7780 ± 0.0464        | 0.8520 ± 0.0780   | 0.9110 ± 0.0330   |
| 12          | Glutamylalanine                | HMDB0003764          | 0.6970 ± 0.2060        | 0.5760 ± 0.2210   | 0.9670 ± 0.4120   |
| 13          | Glycine                        | HMDB0000123          | 18.9000 ± 3.6000       | 15.7000 ± 3.4600  | 15.9000 ± 2.4900  |
| 14          | Glycyl-L-leucine               | HMDB0028929          | 0.4200 ± 0.1130        | 0.2060 ± 0.0533   | 0.4750 ± 0.1900   |
| 15          | Glycylproline                  | HMDB0000721          | 0.3150 ± 0.0626        | 0.2720 ± 0.0595   | 0.2270 ± 0.0188   |
| 16          | Guanidoacetic acid             | HMDB0000128          | 0.0523 ± 0.0094        | 0.0466 ± 0.0122   | 0.0416 ± 0.0084   |
| 17          | L-alpha-Aminobutyric acid      | HMDB0000452          | 0.9030 ± 0.1110        | 0.4100 ± 0.0573   | 0.7200 ± 0.2520   |
| 18          | L-Arginine                     | HMDB0000517          | 84.4000 ± 33.4000      | 58.2000 ± 40.8000 | 56.4000 ± 20.4000 |
| 19          | L-Asparagine                   | HMDB0000168          | 0.6890 ± 0.3310        | 0.2580 ± 0.1830   | 0.8380 ± 0.3690   |
| 20          | L-Aspartic acid                | HMDB0000191          | 3.3400 ± 1.1600        | 2.3100 ± 0.8750   | 3.2800 ± 0.9250   |
| 21          | L-Cysteic acid                 | HMDB0002757          | 1.8700 ± 0.3340        | 2.4900 ± 0.2310   | 2.7400 ± 0.4240   |
| 22          | L-Glutamic acid                | HMDB0000148          | 0.0020 ± 0.0003        | 0.0016 ± 0.0003   | 0.0014 ± 0.0002   |
| 23          | L-Glutamine                    | HMDB0000641          | 2.9500 ± 0.8950        | 2.0100 ± 0.9000   | 2.1500 ± 0.5080   |
| 24          | L-Histidine                    | HMDB0000177          | 1.8400 ± 0.6120        | 1.6200 ± 0.7590   | 1.6600 ± 0.5150   |
| 25          | L-Homoarginine                 | HMDB0000670          | 0.3690 ± 0.0480        | 0.5280 ± 0.0678   | 0.5290 ± 0.0634   |
| 26          | L-Homocitrulline               | HMDB0000679          | 0.1160 ± 0.0143        | 0.1000 ± 0.0119   | 0.1200 ± 0.0223   |
| 27          | L-Homoserine                   | HMDB0000719          | 0.1070 ± 0.0237        | 0.1180 ± 0.0214   | 0.1220 ± 0.0125   |
| 28          | L-Isoleucine                   | HMDB0000172          | 10.6000 ± 1.2700       | 9.4800 ± 2.1200   | 10.8000 ± 1.8900  |
| 29          | L-Kynurenine                   | HMDB0000684          | 0.0322 ± 0.0073        | 0.0208 ± 0.0095   | 0.0301 ± 0.0100   |



**Table S4** (continued)

| NO.        | Component                   | HMDB ID <sup>a</sup> | Content ( $\mu\text{mol/g}$ ) |                      |                       |
|------------|-----------------------------|----------------------|-------------------------------|----------------------|-----------------------|
|            |                             |                      | Control                       | Dark                 | UV-C                  |
| 30         | L-Leucine                   | HMDB0000687          | 16.4000 $\pm$ 1.4800          | 12.6000 $\pm$ 2.6900 | 16.2000 $\pm$ 2.0900  |
| 31         | L-Lysine                    | HMDB0000182          | 15.9000 $\pm$ 2.7100          | 13.7000 $\pm$ 3.1600 | 16.2000 $\pm$ 2.7100  |
| 32         | L-Methionine                | HMDB0000696          | 3.3200 $\pm$ 0.6650           | 2.6400 $\pm$ 0.5280  | 2.6100 $\pm$ 0.3430   |
| 33         | L-Norleucine                | HMDB0001645          | 1.8800 $\pm$ 0.1900           | 1.5400 $\pm$ 0.4080  | 1.9800 $\pm$ 0.3030   |
| 34         | L-Phenylalanine             | HMDB0000159          | 20.9000 $\pm$ 3.8300          | 17.5000 $\pm$ 4.1700 | 23.4000 $\pm$ 3.2200  |
| 35         | L-Pipecolic acid            | HMDB0000716          | 0.0797 $\pm$ 0.0132           | 0.1100 $\pm$ 0.0262  | 0.1150 $\pm$ 0.0323   |
| 36         | L-Proline                   | HMDB0000162          | 12.3000 $\pm$ 1.7100          | 9.0200 $\pm$ 1.6800  | 9.5700 $\pm$ 1.1000   |
| 37         | L-Serine                    | HMDB0000187          | 14.9000 $\pm$ 4.1100          | 11.3000 $\pm$ 4.1500 | 14.1000 $\pm$ 2.6700  |
| 38         | L-Threonine                 | HMDB0000167          | 10.6000 $\pm$ 1.5400          | 9.8700 $\pm$ 2.0600  | 10.1000 $\pm$ 1.3000  |
| 39         | L-Tryptophan                | HMDB0000929          | 0.6460 $\pm$ 0.1380           | 0.4600 $\pm$ 0.1510  | 0.5240 $\pm$ 0.1020   |
| 40         | L-Tyrosine                  | HMDB0000158          | 1.5400 $\pm$ 0.2090           | 1.3200 $\pm$ 0.2350  | 1.6000 $\pm$ 0.1900   |
| 41         | L-Valine                    | HMDB0000883          | 10.4000 $\pm$ 1.9700          | 9.4200 $\pm$ 2.0700  | 11.2000 $\pm$ 1.4300  |
| 42         | N-Acetylhistidine           | HMDB0032055          | 0.0165 $\pm$ 0.0030           | 0.0158 $\pm$ 0.0031  | 0.0170 $\pm$ 0.0032   |
| 43         | N-Acetyl-L-alanine          | HMDB0000766          | 0.5160 $\pm$ 0.2120           | 0.1810 $\pm$ 0.0564  | 0.2530 $\pm$ 0.0822   |
| 44         | N-Acetyl-L-aspartic acid    | HMDB0000812          | 0.1640 $\pm$ 0.0327           | 0.1350 $\pm$ 0.0491  | 0.1500 $\pm$ 0.0474   |
| 45         | N-Acetyl-L-tyrosine         | HMDB0000866          | 0.1830 $\pm$ 0.0441           | 0.0870 $\pm$ 0.0257  | 0.1280 $\pm$ 0.0276   |
| 46         | N-Acetylserine              | HMDB0002931          | 0.8980 $\pm$ 0.1130           | 0.6150 $\pm$ 0.1620  | 0.5610 $\pm$ 0.1070   |
| 47         | N-Acetylserotonin           | HMDB0001238          | 0.0008 $\pm$ 0.0003           | 0.0011 $\pm$ 0.0003  | 0.0007 $\pm$ 0.0003   |
| 48         | N-Acetyltryptophan          | HMDB0013713          | 0.0381 $\pm$ 0.0087           | 0.0184 $\pm$ 0.0063  | 0.0225 $\pm$ 0.0051   |
| 49         | N-Formyl-L-methionine       | HMDB0001015          | 2.0500 $\pm$ 0.2110           | 1.9400 $\pm$ 0.1550  | 1.8800 $\pm$ 0.0600   |
| 50         | N-Isovalerylglycine         | HMDB0000927          | 1.3100 $\pm$ 0.1910           | 2.3400 $\pm$ 0.2110  | 2.4100 $\pm$ 0.1420   |
| 51         | N-Methyl-D-aspartic acid    | HMDB0002393          | 0.0381 $\pm$ 0.0095           | 0.0502 $\pm$ 0.0243  | 0.0318 $\pm$ 0.0043   |
| 52         | Norvaline                   | HMDB0013716          | 71.4000 $\pm$ 10.4000         | 69.1000 $\pm$        | 82.9000 $\pm$ 15.2000 |
| 53         | N-Phenylacetylphenylalanine | HMDB0002372          | 0.0192 $\pm$ 0.0018           | 0.0386 $\pm$ 0.0107  | 0.0280 $\pm$ 0.0037   |
| 54         | Phosphoserine               | HMDB0000272          | 19.2000 $\pm$ 1.0800          | 19.7000 $\pm$ 0.9160 | 19.7000 $\pm$ 1.2500  |
| 55         | Sarcosine                   | HMDB0000271          | 0.5630 $\pm$ 0.2550           | 0.4740 $\pm$ 0.0778  | 0.6150 $\pm$ 0.2170   |
| 56         | Ureidosuccinic acid         | HMDB0000828          | 0.7300 $\pm$ 0.2330           | 0.5430 $\pm$ 0.2360  | 0.7070 $\pm$ 0.1870   |
| Benzenoids |                             |                      |                               |                      |                       |
| 57         | 3-Hydroxyanthranilic acid   | HMDB0001476          | 1.3500 $\pm$ 0.3420           | 1.3100 $\pm$ 0.1440  | 0.9690 $\pm$ 0.1800   |

**Table S4** (continued)

| NO.        | Component                      | HMDB ID <sup>a</sup> | Content ( $\mu\text{mol/g}$ ) |                     |                     |
|------------|--------------------------------|----------------------|-------------------------------|---------------------|---------------------|
|            |                                |                      | Control                       | Dark                | UV-C                |
| 58         | 3-Hydroxyphenylacetic acid     | HMDB0000440          | 0.2010 $\pm$ 0.0548           | 0.2300 $\pm$ 0.0348 | 0.1650 $\pm$ 0.0313 |
| 59         | 4-Hydroxybenzoic acid          | HMDB0000500          | 0.0260 $\pm$ 0.0051           | 0.0254 $\pm$ 0.0034 | 0.0153 $\pm$ 0.0033 |
| 60         | 4-Hydroxyhippuric acid         | HMDB0013678          | 0.0079 $\pm$ 0.0024           | 0.0064 $\pm$ 0.0012 | 0.0077 $\pm$ 0.0009 |
| 61         | Benzoic acid                   | HMDB0001870          | 0.1240 $\pm$ 0.0115           | 0.1160 $\pm$ 0.0180 | 0.1450 $\pm$ 0.0160 |
| 62         | Hippuric acid                  | HMDB0000714          | 0.0014 $\pm$ 0.0002           | 0.0008 $\pm$ 0.0001 | 0.0012 $\pm$ 0.0002 |
| 63         | Homovanillic acid              | HMDB0000118          | 0.0050 $\pm$ 0.0014           | 0.0033 $\pm$ 0.0008 | 0.0014 $\pm$ 0.0007 |
| 64         | Mandelic acid                  | HMDB0000703          | 0.2060 $\pm$ 0.0575           | 0.2210 $\pm$ 0.0257 | 0.1710 $\pm$ 0.0292 |
| 65         | 3-Hydroxyhippuric acid         | HMDB0006116          | 0.0096 $\pm$ 0.0025           | 0.0101 $\pm$ 0.0014 | 0.0096 $\pm$ 0.0007 |
| 66         | Ortho-Hydroxyphenylacetic acid | HMDB0000669          | 0.0615 $\pm$ 0.0161           | 0.0690 $\pm$ 0.0105 | 0.0537 $\pm$ 0.0097 |
| 67         | Phenyllactic acid              | HMDB0000779          | 0.0928 $\pm$ 0.0337           | 0.0751 $\pm$ 0.0415 | 0.0649 $\pm$ 0.0299 |
| 68         | Phenylpyruvic acid             | HMDB0000205          | 0.2770 $\pm$ 0.0609           | 0.2470 $\pm$ 0.1000 | 0.2690 $\pm$ 0.0928 |
| 69         | p-Hydroxyphenylacetic acid     | HMDB0000020          | 0.6850 $\pm$ 0.1770           | 0.5900 $\pm$ 0.0749 | 0.4400 $\pm$ 0.0892 |
| 70         | Protocatechuic acid            | HMDB0001856          | 0.0369 $\pm$ 0.0041           | 0.0501 $\pm$ 0.0040 | 0.0537 $\pm$ 0.0032 |
| 71         | Salicylic acid                 | HMDB0000840          | 0.0060 $\pm$ 0.0009           | 0.0050 $\pm$ 0.0009 | 0.0046 $\pm$ 0.0009 |
| 72         | Vanillic acid                  | HMDB0000484          | 0.0211 $\pm$ 0.0040           | 0.0437 $\pm$ 0.0081 | 0.0433 $\pm$ 0.0068 |
| Bile acids |                                |                      |                               |                     |                     |
| 73         | 12-Dehydrocholic acid          | HMDBID NA17          | 1.1000 $\pm$ 0.2740           | 1.6000 $\pm$ 0.8080 | 0.6830 $\pm$ 0.3930 |
| 74         | 12-Ketolithocholic acid        | HMDB0000328          | 1.6700 $\pm$ 0.1280           | 2.5200 $\pm$ 0.5470 | 2.2900 $\pm$ 0.3630 |
| 75         | 2,4-Dimethyladipic acid        | HMDB0059727          | 0.0053 $\pm$ 0.0009           | 0.0064 $\pm$ 0.0007 | 0.0077 $\pm$ 0.0009 |
| 76         | 3-Dehydrocholic acid           | HMDB0000502          | 0.8700 $\pm$ 0.1880           | 0.8610 $\pm$ 0.2830 | 0.9170 $\pm$ 0.2740 |
| 77         | 6-7-Diketolithocholic acid     | HMDBID NA14          | 0.0262 $\pm$ 0.0044           | 0.0265 $\pm$ 0.0100 | 0.0243 $\pm$ 0.0058 |
| 78         | 6-Ketolithocholic acid         | HMDBID NA19          | 1.9600 $\pm$ 0.2840           | 2.8100 $\pm$ 0.6190 | 2.6000 $\pm$ 0.4090 |
| 79         | 7-Dehydrocholic acid           | HMDB0000391          | 0.4540 $\pm$ 0.1520           | 0.5480 $\pm$ 0.2780 | 0.2130 $\pm$ 0.1110 |
| 80         | 7-Ketolithocholic acid         | HMDB0000467          | 1.1400 $\pm$ 0.0934           | 1.4000 $\pm$ 0.3150 | 1.3800 $\pm$ 0.2430 |
| 81         | Alloisolithocholic Acid        | HMDBID NA18          | 1.6300 $\pm$ 0.2980           | 1.6000 $\pm$ 0.3660 | 1.5200 $\pm$ 0.4270 |
| 82         | Alpha-Muricholic acid          | HMDB0000506          | 2.1800 $\pm$ 0.2890           | 2.0100 $\pm$ 0.2950 | 2.2700 $\pm$ 0.5140 |
| 83         | Apocholic acid                 | HMDBID NA01          | 0.9690 $\pm$ 0.0347           | 1.2700 $\pm$ 0.2530 | 1.2700 $\pm$ 0.2160 |
| 84         | Beta-Hyodeoxycholic acid       | HMDB0000664          | 0.3290 $\pm$ 0.0605           | 0.2780 $\pm$ 0.0772 | 0.2570 $\pm$ 0.0676 |
| 85         | Beta-Muricholic acid           | HMDB0000415          | 2.8900 $\pm$ 0.5420           | 2.3500 $\pm$ 0.7210 | 2.1300 $\pm$ 0.6310 |

**Table S4** (continued)

| NO. | Component                            | HMDB ID <sup>a</sup> | Content ( $\mu\text{mol/g}$ ) |                     |                       |
|-----|--------------------------------------|----------------------|-------------------------------|---------------------|-----------------------|
|     |                                      |                      | Control                       | Dark                | UV-C                  |
| 86  | Cholic acid                          | HMDB0000619          | 0.9700 $\pm$ 0.3940           | 1.0100 $\pm$ 0.4750 | 0.4900 $\pm$ 0.2090   |
| 87  | Deoxycholic acid                     | HMDB0000626          | 0.3230 $\pm$ 0.0423           | 0.2710 $\pm$ 0.0773 | 0.2800 $\pm$ 0.0795   |
| 88  | Deoxycholic acid 3-sulfate           | HMDB0002504          | 0.6270 $\pm$ 0.1560           | 0.4180 $\pm$ 0.2130 | 0.3680 $\pm$ 0.1260   |
| 89  | D-Ribose-5-phosphate                 | HMDB0001548          | 0.1730 $\pm$ 0.0283           | 0.1640 $\pm$ 0.0441 | 0.1560 $\pm$ 0.0241   |
| 90  | Glycochenodeoxycholic acid           | HMDB0000637          | 0.0121 $\pm$ 0.0025           | 0.0148 $\pm$ 0.0017 | 0.0138 $\pm$ 0.0038   |
| 91  | Glycochenodeoxycholic acid-3-sulfate | HMDB0002497          | 0.0019 $\pm$ 0.0001           | 0.0018 $\pm$ 0.0002 | 0.0019 $\pm$ 0.0002   |
| 92  | Glycocholic acid                     | HMDB0000138          | 0.0095 $\pm$ 0.0059           | 0.0040 $\pm$ 0.0016 | 0.0031 $\pm$ 0.0013   |
| 93  | Glycodeoxycholic acid                | HMDB0000631          | 0.0152 $\pm$ 0.0034           | 0.0153 $\pm$ 0.0019 | 0.0175 $\pm$ 0.0057   |
| 94  | Glycodeoxycholic acid-3-sulfate      | HMDBID NA26          | 0.0013 $\pm$ 0.0001           | 0.0010 $\pm$ 0.0001 | 0.0010 $\pm$ 0.0001   |
| 95  | Glycohyocholic acid                  | HMDB0240607          | 0.0089 $\pm$ 0.0047           | 0.0045 $\pm$ 0.0015 | 0.0033 $\pm$ 0.0011   |
| 96  | Glycohyodeoxycholic acid             | HMDB0304944          | 0.0021 $\pm$ 0.0005           | 0.0012 $\pm$ 0.0002 | 0.0010 $\pm$ 0.0003   |
| 97  | Glycolithocholic acid-3-sulfate      | HMDB0002639          | 0.0005 $\pm$ 2.10E-05         | 0.0007 $\pm$ 0.0001 | 0.0006 $\pm$ 3.65E-05 |
| 98  | Glycoursodeoxycholic acid            | HMDB0000708          | 0.0019 $\pm$ 0.0003           | 0.0012 $\pm$ 0.0001 | 0.0013 $\pm$ 0.0003   |
| 99  | Hyocholic acid                       | HMDB0000760          | 1.2000 $\pm$ 0.4450           | 1.3300 $\pm$ 0.6380 | 0.6450 $\pm$ 0.3050   |
| 100 | Hyodeoxycholic acid                  | HMDB0000733          | 0.3220 $\pm$ 0.0504           | 0.2790 $\pm$ 0.0797 | 0.2660 $\pm$ 0.0711   |
| 101 | Isoodeoxycholic acid                 | HMDB0002536          | 3.1600 $\pm$ 0.6260           | 4.5500 $\pm$ 0.9810 | 3.8900 $\pm$ 0.9480   |
| 102 | Isolithocholic acid                  | HMDB0000717          | 0.1120 $\pm$ 0.0237           | 0.0631 $\pm$ 0.0103 | 0.0658 $\pm$ 0.0175   |
| 103 | Lithocholic acid                     | HMDB0000761          | 0.7550 $\pm$ 0.1670           | 0.6620 $\pm$ 0.1630 | 0.6950 $\pm$ 0.2160   |
| 104 | Nordeoxycholic acid                  | HMDB0304947          | 0.0031 $\pm$ 0.0009           | 0.0015 $\pm$ 0.0006 | 0.0014 $\pm$ 0.0004   |
| 105 | Omega-muricholic acid                | HMDB0000364          | 1.0000 $\pm$ 0.1170           | 1.0200 $\pm$ 0.1600 | 0.9810 $\pm$ 0.1930   |
| 106 | Tauro-alpha-muricholic acid          | HMDB0258742          | 0.1510 $\pm$ 0.0724           | 0.0480 $\pm$ 0.0064 | 0.0659 $\pm$ 0.0130   |
| 107 | Taurochenodeoxycholic acid           | HMDB0000951          | 0.0344 $\pm$ 0.0094           | 0.0335 $\pm$ 0.0056 | 0.0355 $\pm$ 0.0123   |
| 108 | Taurocholic acid                     | HMDB0000036          | 0.1410 $\pm$ 0.0788           | 0.0724 $\pm$ 0.0136 | 0.0805 $\pm$ 0.0169   |
| 109 | Taurodeoxycholic acid                | HMDB0000896          | 0.0374 $\pm$ 0.0105           | 0.0370 $\pm$ 0.0056 | 0.0411 $\pm$ 0.0147   |
| 110 | Taurohyocholic acid                  | HMDB0011637          | 0.1360 $\pm$ 0.0646           | 0.0646 $\pm$ 0.0095 | 0.0699 $\pm$ 0.0169   |
| 111 | Taurohyodeoxycholic acid             | HMDBID NA08          | 0.0067 $\pm$ 0.0014           | 0.0044 $\pm$ 0.0007 | 0.0044 $\pm$ 0.0009   |
| 112 | Tauroolithocholic acid               | HMDB0000722          | 0.0017 $\pm$ 0.0003           | 0.0015 $\pm$ 0.0003 | 0.0020 $\pm$ 0.0006   |
| 113 | Tauroursodeoxycholic acid            | HMDB0000874          | 0.0112 $\pm$ 0.0025           | 0.0079 $\pm$ 0.0019 | 0.0096 $\pm$ 0.0021   |
| 114 | Ursodeoxycholic acid                 | HMDB0000946          | 0.3000 $\pm$ 0.0629           | 0.2310 $\pm$ 0.0658 | 0.2320 $\pm$ 0.0635   |

**Table S4** (continued)

| NO.           | Component                    | HMDB ID <sup>a</sup> | Content ( $\mu\text{mol/g}$ ) |                       |                       |
|---------------|------------------------------|----------------------|-------------------------------|-----------------------|-----------------------|
|               |                              |                      | Control                       | Dark                  | UV-C                  |
| Carbohydrates |                              |                      |                               |                       |                       |
| 115           | Beta-D-Fucose                | HMDB0003081          | 4.0400 $\pm$ 0.5320           | 4.1400 $\pm$ 0.4630   | 3.2200 $\pm$ 0.5120   |
| 116           | D-Fructose                   | HMDB0000660          | 0.7410 $\pm$ 0.1570           | 1.1100 $\pm$ 0.3690   | 1.0500 $\pm$ 0.3570   |
| 117           | D-Ribulose                   | HMDB0000621          | 4.5000 $\pm$ 0.3540           | 4.4300 $\pm$ 0.4250   | 4.5300 $\pm$ 0.8680   |
| 118           | D-Xylose                     | HMDB0000098          | 48.1000 $\pm$ 5.9600          | 38.3000 $\pm$ 5.1600  | 35.5000 $\pm$ 5.4600  |
| 119           | D-Xylulose                   | HMDB0001644          | 1.5400 $\pm$ 0.4120           | 1.4600 $\pm$ 0.2340   | 0.9090 $\pm$ 0.1570   |
| 120           | Erythronic acid              | HMDB0000613          | 0.0112 $\pm$ 0.0023           | 0.0097 $\pm$ 0.0019   | 0.0124 $\pm$ 0.0020   |
| 121           | Fructose-6-phosphate         | HMDB0000124          | 0.0090 $\pm$ 0.0030           | 0.0351 $\pm$ 0.0321   | 0.0155 $\pm$ 0.0130   |
| 122           | Glucaric acid                | HMDB0000663          | 0.0104 $\pm$ 0.0021           | 0.0130 $\pm$ 0.0037   | 0.0082 $\pm$ 0.0017   |
| 123           | Glucose-6-phosphate          | HMDB0001401          | 0.0088 $\pm$ 0.0023           | 0.0400 $\pm$ 0.0371   | 0.0181 $\pm$ 0.0142   |
| 124           | Glyceraldehyde               | HMDB0001051          | 0.0345 $\pm$ 0.0061           | 0.0269 $\pm$ 0.0024   | 0.0248 $\pm$ 0.0041   |
| 125           | Glyceric acid                | HMDB0000139          | 0.0199 $\pm$ 0.0050           | 0.0159 $\pm$ 0.0044   | 0.0168 $\pm$ 0.0026   |
| 126           | Maltotriose                  | HMDB0001262          | 0.3710 $\pm$ 0.0825           | 0.4950 $\pm$ 0.2170   | 0.7050 $\pm$ 0.3120   |
| 127           | Melibiose                    | HMDB0000048          | 0.0805 $\pm$ 0.0181           | 0.0385 $\pm$ 0.0088   | 0.0360 $\pm$ 0.0064   |
| 128           | N-Acetyl-D-glucosamine       | HMDB0000215          | 37.2000 $\pm$ 4.0000          | 36.5000 $\pm$ 6.3500  | 43.7000 $\pm$ 8.3900  |
| 129           | N-Acetylneuraminic acid      | HMDB0000230          | 6.4200 $\pm$ 1.0300           | 5.3900 $\pm$ 1.3900   | 3.6500 $\pm$ 0.5720   |
| 130           | Rhamnose                     | HMDB0000849          | 4.2100 $\pm$ 0.6960           | 4.5100 $\pm$ 0.6680   | 3.9700 $\pm$ 0.5980   |
| Carnitines    |                              |                      |                               |                       |                       |
| 131           | 2-Methylbutyrylcarnitine     | HMDB0000378          | 0.0010 $\pm$ 0.0005           | 0.0008 $\pm$ 0.0007   | 0.0008 $\pm$ 0.0006   |
| 132           | 3-Hydroxyisovalerylcarnitine | HMDB0061189          | 0.0036 $\pm$ 0.0011           | 0.0038 $\pm$ 0.0012   | 0.0037 $\pm$ 0.0007   |
| 133           | Adipoylcarnitine             | HMDB0061677          | 0.0046 $\pm$ 0.0025           | 0.0024 $\pm$ 0.0013   | 0.0030 $\pm$ 0.0013   |
| 134           | Butyrylcarnitine             | HMDB0002013          | 0.0047 $\pm$ 0.0015           | 0.0026 $\pm$ 0.0015   | 0.0028 $\pm$ 0.0014   |
| 135           | Carnitine                    | HMDB0000062          | 0.1130 $\pm$ 0.0576           | 0.0504 $\pm$ 0.0216   | 0.0759 $\pm$ 0.0516   |
| 136           | Glutarylcarnitine            | HMDB0013130          | 0.0160 $\pm$ 0.0085           | 0.0076 $\pm$ 0.0028   | 0.0137 $\pm$ 0.0078   |
| 137           | Hexanylcarnitine             | HMDB0000705          | 0.0001 $\pm$ 1.00E-07         | 0.0001 $\pm$ 3.33E-05 | 0.0001 $\pm$ 3.33E-05 |
| 138           | Linoleylcarnitine            | HMDB0006469          | 0.0199 $\pm$ 0.0067           | 0.0323 $\pm$ 0.0196   | 0.0288 $\pm$ 0.0133   |
| 139           | Malonylcarnitine             | HMDB0002095          | 0.0317 $\pm$ 0.0033           | 0.0167 $\pm$ 0.0023   | 0.0721 $\pm$ 0.0383   |
| 140           | Methylmalonylcarnitine       | HMDB0013133          | 0.0136 $\pm$ 0.0037           | 0.0217 $\pm$ 0.0027   | 0.0459 $\pm$ 0.0067   |
| 141           | Myristoylcarnitine           | HMDB0005066          | 0.0153 $\pm$ 0.0063           | 0.0103 $\pm$ 0.0058   | 0.0105 $\pm$ 0.0052   |

**Table S4** (continued)

| NO.         | Component                      | HMDB ID <sup>a</sup> | Content ( $\mu\text{mol/g}$ ) |                      |                      |
|-------------|--------------------------------|----------------------|-------------------------------|----------------------|----------------------|
|             |                                |                      | Control                       | Dark                 | UV-C                 |
| 142         | Oleylecarnitine                | HMDB0005065          | 0.2580 $\pm$ 0.0575           | 0.2690 $\pm$ 0.0893  | 0.3730 $\pm$ 0.1570  |
| 143         | Palmitoylcarnitine             | HMDB0000222          | 0.2080 $\pm$ 0.0487           | 0.2060 $\pm$ 0.0636  | 0.2480 $\pm$ 0.0923  |
| Fatty acids |                                |                      |                               |                      |                      |
| 144         | 10Z-Heptadecenoic acid         | HMDB0060038          | 2.4300 $\pm$ 0.3280           | 1.7000 $\pm$ 0.1930  | 1.4300 $\pm$ 0.1380  |
| 145         | 12-Tridecenoic acid            | HMDBID NA11          | 0.0060 $\pm$ 0.0020           | 0.0096 $\pm$ 0.0013  | 0.0066 $\pm$ 0.0011  |
| 146         | 2-Hydroxy-3-methylbutyric acid | HMDB0000407          | 0.0092 $\pm$ 0.0018           | 0.0147 $\pm$ 0.0039  | 0.0098 $\pm$ 0.0017  |
| 147         | 2-Hydroxycaproic acid          | HMDB0001624          | 0.0540 $\pm$ 0.0220           | 0.0459 $\pm$ 0.0107  | 0.0282 $\pm$ 0.0088  |
| 148         | 2-Methyl-4-pentenoic acid      | HMDB0031158          | 0.1580 $\pm$ 0.0465           | 0.1060 $\pm$ 0.0297  | 0.1620 $\pm$ 0.0461  |
| 149         | 2-Methylhexanoic acid          | HMDB0031594          | 0.0018 $\pm$ 0.0004           | 0.0019 $\pm$ 0.0005  | 0.0016 $\pm$ 0.0005  |
| 150         | 2-Methylvaleric acid           | HMDB0031580          | 0.0023 $\pm$ 0.0009           | 0.0029 $\pm$ 0.0012  | 0.0024 $\pm$ 0.0011  |
| 151         | 3-Hydroxyisovaleric acid       | HMDB0000754          | 0.0045 $\pm$ 0.0007           | 0.0066 $\pm$ 0.0009  | 0.0047 $\pm$ 0.0006  |
| 152         | 3-Methylpentanoic acid         | HMDB0033774          | 0.0013 $\pm$ 0.0001           | 0.0012 $\pm$ 0.0001  | 0.0011 $\pm$ 0.0002  |
| 153         | 5-Dodecenoic acid              | HMDB0000529          | 0.0159 $\pm$ 0.0100           | 0.0102 $\pm$ 0.0032  | 0.0087 $\pm$ 0.0017  |
| 154         | Acetic acid                    | HMDB0000042          | 0.1490 $\pm$ 0.0120           | 0.2610 $\pm$ 0.0811  | 0.1980 $\pm$ 0.0370  |
| 155         | Adipic acid                    | HMDB0000448          | 0.0105 $\pm$ 0.0013           | 0.0122 $\pm$ 0.0014  | 0.0140 $\pm$ 0.0017  |
| 156         | Alpha-Linolenic acid           | HMDB0001388          | 3.9200 $\pm$ 1.1500           | 2.2200 $\pm$ 0.3460  | 0.9200 $\pm$ 0.1250  |
| 157         | Aminocaproic acid              | HMDB0001901          | 2.0800 $\pm$ 0.4610           | 2.6400 $\pm$ 1.1800  | 1.9600 $\pm$ 0.4030  |
| 158         | Azelaic acid                   | HMDB0000784          | 0.0767 $\pm$ 0.0195           | 0.3310 $\pm$ 0.0626  | 0.1820 $\pm$ 0.0271  |
| 159         | But-2-enoic acid               | HMDB0010720          | 0.0051 $\pm$ 0.0016           | 0.0070 $\pm$ 0.0028  | 0.0124 $\pm$ 0.0034  |
| 160         | Butyric acid                   | HMDB0000039          | 0.3350 $\pm$ 0.0563           | 0.2780 $\pm$ 0.0677  | 0.2790 $\pm$ 0.0861  |
| 161         | Hexanoic acid                  | HMDB0000535          | 0.0341 $\pm$ 0.0029           | 0.0472 $\pm$ 0.0041  | 0.0431 $\pm$ 0.0036  |
| 162         | Citraconic acid                | HMDB0000634          | 0.0075 $\pm$ 0.0009           | 0.0109 $\pm$ 0.0042  | 0.0303 $\pm$ 0.0108  |
| 163         | Dodecanoic acid                | HMDB0000638          | 0.1540 $\pm$ 0.0449           | 0.2170 $\pm$ 0.0510  | 0.1330 $\pm$ 0.0127  |
| 164         | Ethylmethylacetic acid         | HMDB0002176          | 0.3010 $\pm$ 0.0654           | 0.2830 $\pm$ 0.0733  | 0.2920 $\pm$ 0.0824  |
| 165         | Gamma-Linolenic acid           | HMDB0003073          | 2.9200 $\pm$ 0.8620           | 1.5300 $\pm$ 0.1560  | 0.6570 $\pm$ 0.0879  |
| 166         | Heptanoic acid                 | HMDB0000666          | 0.0109 $\pm$ 0.0010           | 0.0148 $\pm$ 0.0008  | 0.0160 $\pm$ 0.0017  |
| 167         | Isobutyric acid                | HMDB0001873          | 0.0791 $\pm$ 0.0276           | 0.1110 $\pm$ 0.0349  | 0.0800 $\pm$ 0.0248  |
| 168         | Isovaleric acid                | HMDB0000718          | 0.2450 $\pm$ 0.0271           | 0.2130 $\pm$ 0.0282  | 0.2030 $\pm$ 0.0271  |
| 169         | Linoelaidic acid               | HMDB0006270          | 19.2000 $\pm$ 3.1600          | 18.0000 $\pm$ 1.2100 | 12.0000 $\pm$ 2.7800 |

**Table S4** (continued)

| NO.         | Component                | HMDB ID <sup>a</sup> | Content (μmol/g)  |                  |                  |
|-------------|--------------------------|----------------------|-------------------|------------------|------------------|
|             |                          |                      | Control           | Dark             | UV-C             |
| 170         | Methylglutaric acid      | HMDB0000752          | 0.0059 ± 0.0010   | 0.0073 ± 0.0009  | 0.0087 ± 0.0012  |
| 171         | Methylsuccinic acid      | HMDB0001844          | 0.0431 ± 0.0057   | 0.0418 ± 0.0068  | 0.0645 ± 0.0025  |
| 172         | Myristelaidic acid       | HMDB0062248          | 0.1660 ± 0.1130   | 0.0492 ± 0.0154  | 0.0576 ± 0.0012  |
| 173         | Myristic acid            | HMDB0000806          | 2.1900 ± 0.4350   | 2.0600 ± 0.2670  | 1.6900 ± 0.2370  |
| 174         | Myristoleic acid         | HMDB0002000          | 0.1510 ± 0.0788   | 0.0478 ± 0.0160  | 0.0537 ± 0.0124  |
| 175         | Octanoic acid            | HMDB0000482          | 0.0826 ± 0.0104   | 0.1240 ± 0.0323  | 0.1330 ± 0.0277  |
| 176         | Palmitelaidic acid       | HMDB0012328          | 7.8600 ± 2.2200   | 3.5300 ± 0.8660  | 2.7200 ± 0.6370  |
| 177         | Palmitoleic acid         | HMDB0003229          | 7.4400 ± 2.5800   | 3.3900 ± 0.8220  | 2.7400 ± 0.6670  |
| 178         | Pentadecanoic acid       | HMDB0000826          | 42.2000 ± 12.3000 | 30.0000 ± 5.3000 | 44.2000 ± 7.6900 |
| 179         | Pimelic acid             | HMDB0000857          | 0.0050 ± 0.0009   | 0.0126 ± 0.0019  | 0.0114 ± 0.0016  |
| 180         | Propanoic acid           | HMDB0000237          | 0.6470 ± 0.2190   | 0.6180 ± 0.1370  | 0.4090 ± 0.0808  |
| 181         | Ricinoleic acid          | HMDB0034297          | 0.6600 ± 0.1240   | 1.1400 ± 0.0823  | 0.7840 ± 0.2480  |
| 182         | Sebacic acid             | HMDB0000792          | 0.0274 ± 0.0054   | 0.1770 ± 0.0421  | 0.0971 ± 0.0136  |
| 183         | Suberic acid             | HMDB0000893          | 0.0293 ± 0.0074   | 0.0895 ± 0.0129  | 0.0896 ± 0.0097  |
| 184         | Tridecanoic acid         | HMDB0000910          | 0.1710 ± 0.0414   | 0.1890 ± 0.0267  | 0.1610 ± 0.0214  |
| 185         | Undecanoic acid          | HMDB0000947          | 0.0193 ± 0.0063   | 0.0114 ± 0.0022  | 0.0108 ± 0.0014  |
| 186         | Valeric acid             | HMDB0000892          | 0.2560 ± 0.0221   | 0.2230 ± 0.0313  | 0.2180 ± 0.0323  |
| Indoles     |                          |                      |                   |                  |                  |
| 187         | 3-Indolepropionic acid   | HMDB0002302          | 0.0038 ± 0.0006   | 0.0033 ± 0.0004  | 0.0032 ± 0.0006  |
| 188         | Indole-3-aldehyde        | HMDB0029737          | 0.0048 ± 0.0016   | 0.0045 ± 0.0018  | 0.0066 ± 0.0033  |
| 189         | Indole-3-carboxylic acid | HMDB0003320          | 0.0148 ± 0.0027   | 0.0142 ± 0.0025  | 0.0151 ± 0.0039  |
| 190         | Indoleacrylic acid       | HMDB0000734          | 0.1020 ± 0.0365   | 0.0625 ± 0.0187  | 0.0925 ± 0.0412  |
| 191         | 3-Methylindole           | HMDB0000466          | 1.8000 ± 0.1740   | 2.4800 ± 0.2280  | 2.6400 ± 0.1860  |
| 192         | Tryptamine               | HMDB0000303          | 0.6620 ± 0.0695   | 0.8710 ± 0.0889  | 0.9510 ± 0.0531  |
| Lipid       |                          |                      |                   |                  |                  |
| 193         | Valerylcarnitine         | HMDB0013128          | 0.0011 ± 0.0005   | 0.0009 ± 0.0008  | 0.0009 ± 0.0006  |
| Nucleosides |                          |                      |                   |                  |                  |
| 194         | Adenosine monophosphate  | HMDB0000045          | 0.0094 ± 0.0038   | 0.0208 ± 0.0137  | 0.0179 ± 0.0091  |
| 195         | S-Adenosylhomocysteine   | HMDB0000939          | 0.0102 ± 0.0012   | 0.0078 ± 0.0011  | 0.0118 ± 0.0025  |

**Table S4** (continued)

| NO.           | Component                     | HMDB ID <sup>a</sup> | Content ( $\mu\text{mol/g}$ ) |                     |                     |
|---------------|-------------------------------|----------------------|-------------------------------|---------------------|---------------------|
|               |                               |                      | Control                       | Dark                | UV-C                |
| Organic acids |                               |                      |                               |                     |                     |
| 196           | 15-HETE                       | HMDB0003876          | 0.5220 $\pm$ 0.1620           | 1.1000 $\pm$ 0.4180 | 0.5450 $\pm$ 0.1020 |
| 197           | 2-2-Dimethylsuccinic acid     | HMDB0002074          | 0.0109 $\pm$ 0.0016           | 0.0141 $\pm$ 0.0017 | 0.0164 $\pm$ 0.0020 |
| 198           | 2-Hydroxybutyric acid         | HMDB0000008          | 0.0035 $\pm$ 0.0009           | 0.0042 $\pm$ 0.0013 | 0.0079 $\pm$ 0.0021 |
| 199           | 3-Hydroxybutyric acid         | HMDB0000357          | 0.0042 $\pm$ 0.0013           | 0.0057 $\pm$ 0.0027 | 0.0096 $\pm$ 0.0026 |
| 200           | 3-Methyl-2-oxovaleric acid    | HMDB0000491          | 1.1800 $\pm$ 0.2070           | 1.0600 $\pm$ 0.3370 | 1.3300 $\pm$ 0.4550 |
| 201           | 5-Hydroxyindole-3-acetic acid | HMDB0000763          | 0.0125 $\pm$ 0.0027           | 0.0186 $\pm$ 0.0053 | 0.0140 $\pm$ 0.0047 |
| 202           | Acetoacetic acid              | HMDB0000060          | 1.2200 $\pm$ 0.1410           | 0.9450 $\pm$ 0.2110 | 1.3200 $\pm$ 0.3110 |
| 203           | Alpha-Hydroxyisobutyric acid  | HMDB0000729          | 0.0061 $\pm$ 0.0027           | 0.0064 $\pm$ 0.0031 | 0.0116 $\pm$ 0.0035 |
| 204           | Alpha-Ketoisovaleric acid     | HMDB0000019          | 2.4000 $\pm$ 0.6740           | 4.1100 $\pm$ 0.5680 | 3.4600 $\pm$ 0.8870 |
| 205           | Citric acid                   | HMDB0000094          | 0.0325 $\pm$ 0.0102           | 0.0265 $\pm$ 0.0100 | 0.0204 $\pm$ 0.0071 |
| 206           | D-2-Hydroxyglutaric acid      | HMDB0000606          | 0.1080 $\pm$ 0.0249           | 0.2070 $\pm$ 0.1240 | 0.3510 $\pm$ 0.1600 |
| 207           | Fumaric acid                  | HMDB0000134          | 3.1600 $\pm$ 0.8230           | 3.1300 $\pm$ 0.7800 | 1.9700 $\pm$ 0.4270 |
| 208           | Galactonic acid               | HMDB0000565          | 0.0130 $\pm$ 0.0026           | 0.0098 $\pm$ 0.0030 | 0.0057 $\pm$ 0.0019 |
| 209           | Glutaric acid                 | HMDB0000661          | 0.0219 $\pm$ 0.0018           | 0.0199 $\pm$ 0.0028 | 0.0315 $\pm$ 0.0118 |
| 210           | Glycolic acid                 | HMDB0000115          | 0.2370 $\pm$ 0.0428           | 0.3480 $\pm$ 0.0808 | 0.4870 $\pm$ 0.0980 |
| 211           | Hydroxypropionic acid         | HMDB0000700          | 0.7280 $\pm$ 0.0973           | 1.0200 $\pm$ 0.3160 | 0.7840 $\pm$ 0.1730 |
| 212           | Isocitric acid                | HMDB0000193          | 0.0130 $\pm$ 0.0028           | 0.0076 $\pm$ 0.0010 | 0.0153 $\pm$ 0.0027 |
| 213           | Itaconic acid                 | HMDB0002092          | 0.0058 $\pm$ 0.0025           | 0.0047 $\pm$ 0.0025 | 0.0036 $\pm$ 0.0005 |
| 214           | Ketoleucine                   | HMDB0000695          | 0.9850 $\pm$ 0.1720           | 0.9430 $\pm$ 0.2870 | 1.1500 $\pm$ 0.3940 |
| 215           | L-Dopa                        | HMDB0000181          | 0.2440 $\pm$ 0.0649           | 0.2530 $\pm$ 0.0195 | 0.2360 $\pm$ 0.0341 |
| 216           | L-Malic acid                  | HMDB0000156          | 2.2900 $\pm$ 0.9740           | 2.1400 $\pm$ 0.6380 | 1.1200 $\pm$ 0.3530 |
| 217           | Maleic acid                   | HMDB0000176          | 1.6800 $\pm$ 0.5480           | 1.8500 $\pm$ 0.5740 | 0.9990 $\pm$ 0.2600 |
| 218           | Malonic acid                  | HMDB0000691          | 0.0163 $\pm$ 0.0012           | 0.0165 $\pm$ 0.0017 | 0.0146 $\pm$ 0.0021 |
| 219           | Methylmalonic acid            | HMDB0000202          | 0.4150 $\pm$ 0.0844           | 0.3640 $\pm$ 0.0836 | 0.3540 $\pm$ 0.0630 |
| 220           | Oxalic acid                   | HMDB0002329          | 1.2400 $\pm$ 0.2940           | 0.8140 $\pm$ 0.0934 | 0.7660 $\pm$ 0.1220 |
| 0221          | 2-Oxoadipic acid              | HMDB0000225          | 0.0021 $\pm$ 0.0002           | 0.0042 $\pm$ 0.0008 | 0.0040 $\pm$ 0.0009 |
| 222           | Oxoglutaric acid              | HMDB0000208          | 2.1200 $\pm$ 0.4710           | 3.0100 $\pm$ 1.1100 | 3.9500 $\pm$ 1.4500 |
| 223           | Quinic acid                   | HMDB0003072          | 0.0883 $\pm$ 0.0306           | 0.0900 $\pm$ 0.0238 | 0.0633 $\pm$ 0.0149 |

**Table S4** (continued)

| NO.                   | Component                            | HMDB ID <sup>a</sup> | Content (μmol/g) |                 |                 |
|-----------------------|--------------------------------------|----------------------|------------------|-----------------|-----------------|
|                       |                                      |                      | Control          | Dark            | UV-C            |
| 224                   | Quinolinic acid                      | HMDB0000232          | 0.8050 ± 0.1380  | 0.9220 ± 0.2560 | 1.2300 ± 0.2550 |
| 225                   | Shikimic acid                        | HMDB0003070          | 0.1740 ± 0.0581  | 0.1290 ± 0.0444 | 0.3440 ± 0.1740 |
| 226                   | Succinic acid                        | HMDB0000254          | 0.3960 ± 0.0637  | 0.3750 ± 0.0829 | 0.3630 ± 0.0661 |
| 227                   | Vanillymandelic acid                 | HMDB0000291          | 0.7160 ± 0.0925  | 0.7030 ± 0.0936 | 0.8090 ± 0.1140 |
| 228                   | Tartaric acid                        | HMDB0000956          | 0.0015 ± 0.0002  | 0.0116 ± 0.0012 | 0.0128 ± 0.0017 |
| Peptidomimetics       |                                      |                      |                  |                 |                 |
| 229                   | Anserine                             | HMDB0000194          | 0.0502 ± 0.0077  | 0.0469 ± 0.0083 | 0.0398 ± 0.0083 |
| 230                   | Carnosine                            | HMDB0000033          | 0.0127 ± 0.0022  | 0.0104 ± 0.0016 | 0.0098 ± 0.0015 |
| Phenylpropanoic acids |                                      |                      |                  |                 |                 |
| 231                   | 2-Hydroxycinnamic acid               | HMDB0002641          | 0.0290 ± 0.0059  | 0.0286 ± 0.0078 | 0.0357 ± 0.0097 |
| 232                   | 2-Phenylpropionate                   | HMDB0011743          | 0.3040 ± 0.0560  | 0.3200 ± 0.0628 | 0.3280 ± 0.0629 |
| 233                   | 3-3-Hydroxyphenyl-3-hydroxypropanoic | HMDB0002643          | 0.0027 ± 0.0004  | 0.0038 ± 0.0003 | 0.0041 ± 0.0005 |
| 234                   | Hydrocinnamic acid                   | HMDB0000764          | 0.5350 ± 0.0933  | 0.5530 ± 0.1130 | 0.6060 ± 0.1210 |
| 235                   | Cinnamic acid                        | HMDB0000567          | 0.7770 ± 0.4760  | 1.1500 ± 0.8460 | 0.6260 ± 0.2700 |
| 236                   | 3-4-Dihydroxyhydrocinnamic acid      | HMDB0000423          | 0.0083 ± 0.0023  | 0.0212 ± 0.0033 | 0.0264 ± 0.0069 |
| 237                   | Coumarinic acid                      | HMDB0041592          | 0.0372 ± 0.0064  | 0.0439 ± 0.0134 | 0.0509 ± 0.0116 |
| Pyridines             |                                      |                      |                  |                 |                 |
| 238                   | 3-Pyridylacetic acid                 | HMDB0001538          | 0.0029 ± 0.0005  | 0.0023 ± 0.0003 | 0.0019 ± 0.0002 |
| 239                   | Nicotinic acid                       | HMDB0001488          | 1.0200 ± 0.1330  | 1.1400 ± 0.2260 | 1.4700 ± 0.2940 |
| 240                   | Picolinic acid                       | HMDB0002243          | 5.0600 ± 0.6980  | 7.2800 ± 1.0300 | 7.5700 ± 0.6580 |

The data were expressed as mean ± SE and the value was an average of recordings from fecal samples of six mice.

a: Metabolites were annotated by the ID of the Human Metabolome Database (HMDB).
